# Supplementary material for: Respiratory Health Effects of In Vivo Sub-Chronic Diesel and Biodiesel Exhaust Exposure
Source: MDPI journal article supplement (doi:10.3390/ijms24065130), 2023-03-07
Supplement: s1 [file s1]

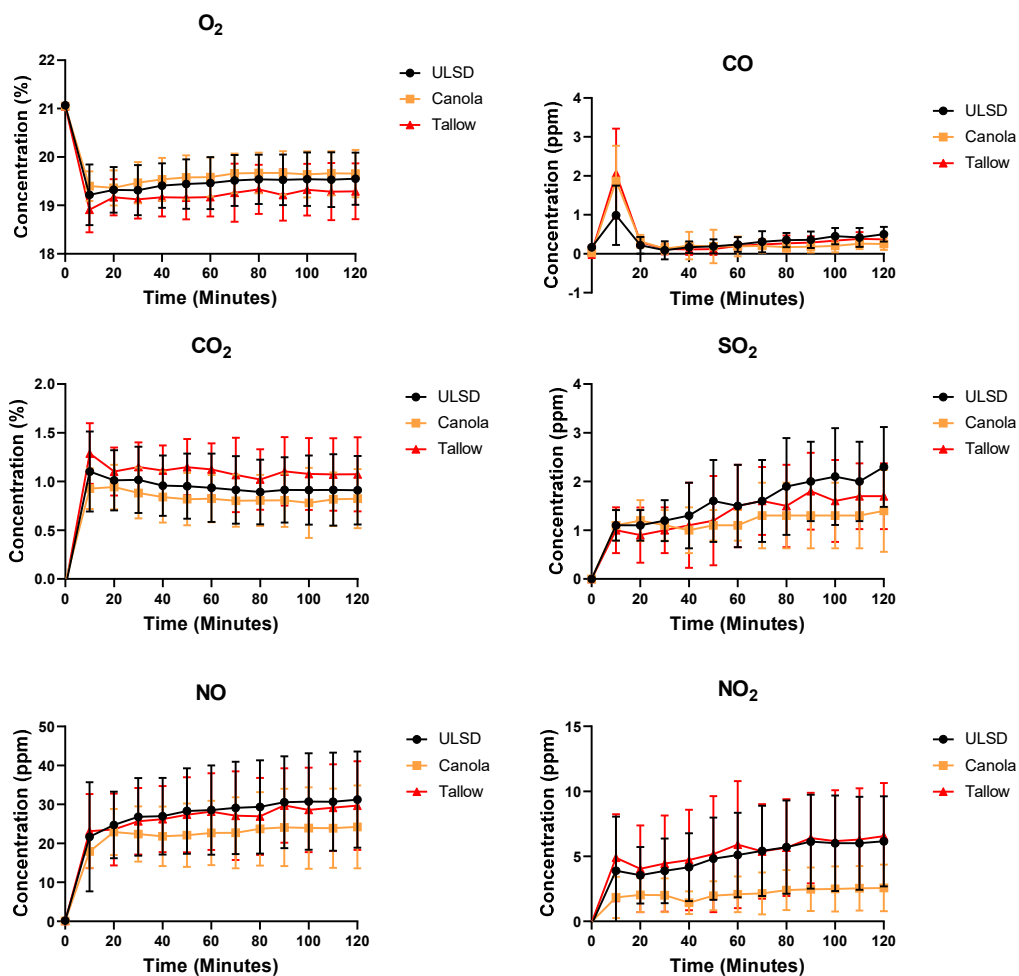

Figure S1: Changes in gas concentrations over time.

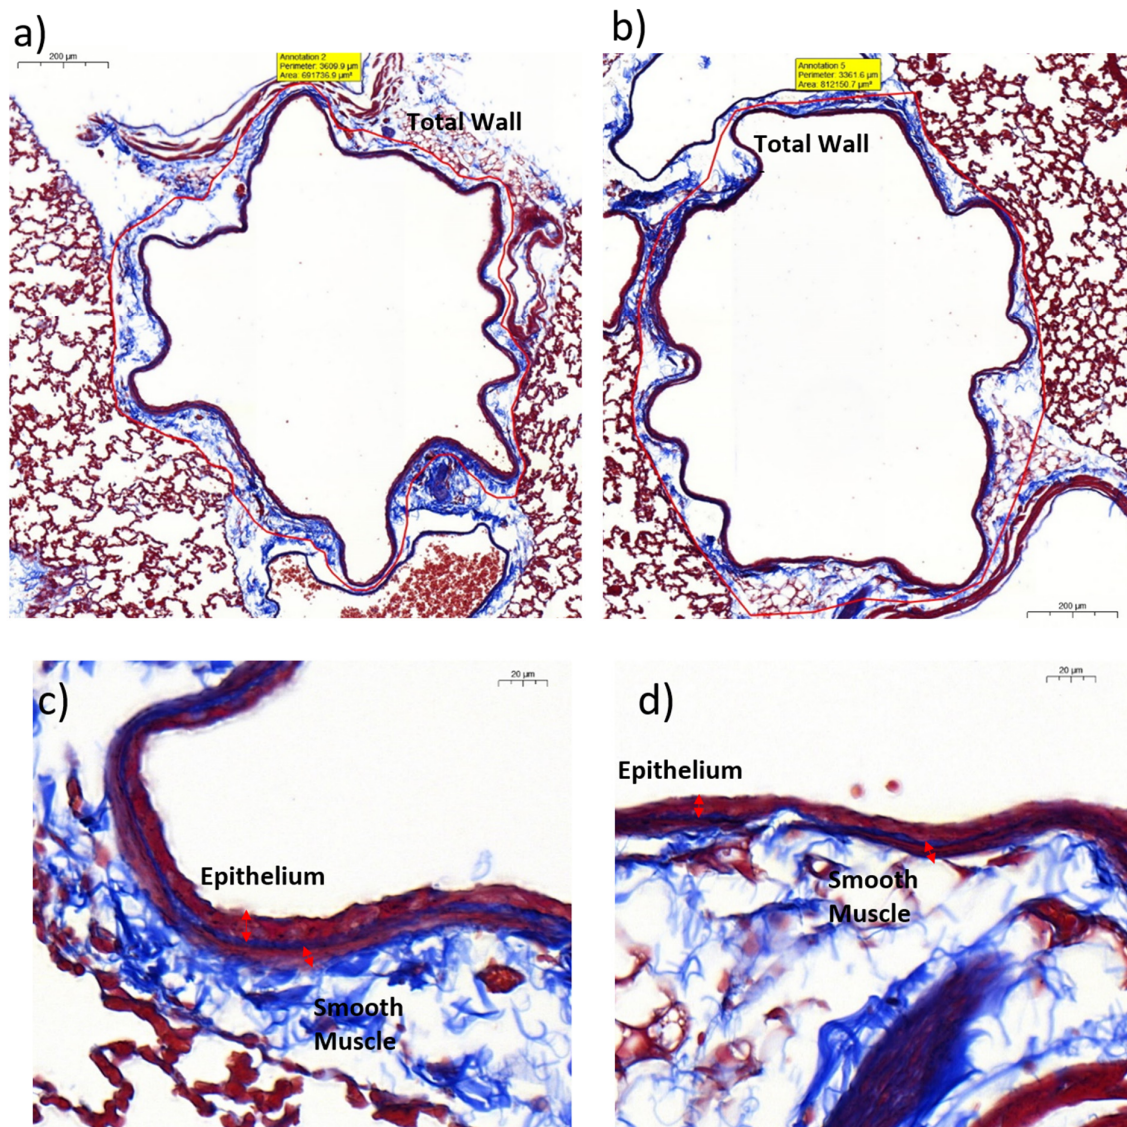

**Figure S2:** Representative images of airway sections stained with Masson's Trichrome. Images are taken from Air and ULSD exhaust exposed mice. (a) and (c) are whole and zoomed airway images of a representative Air exposed mouse while (b) and (d) are the same for an exhaust exposed mouse. The different airway measurements are outlined in red.
